# Supplementary material for: The western Andes at ~20–22° S: A contribution to the quantification of crustal shortening and kinematics of deformation
Source: Copernicus journal article supplement (doi:10.5194/egusphere-2022-629), 2022-07-14
Supplement: Supplementary file 3 [file egusphere-2022-629-supplement.zip]

Archive with 2 entries (2 files):
- field_Habel_etal__SE_2022.kmz
- Supp-Info_Habel-et-al-2022-V1.pdf
